# Supplementary material
Source: PubMed Central journal article supplement (PMC6643679)
Supplement: ao8b02559_si_001.pdf [file ao8b02559_si_001.pdf]

# Star-like supramolecular complexes of reducing- end functionalized cellulose nanocrystals

*Ana Villares,<sup>a\*</sup> Céline Moreau,<sup>a</sup> Bernard Cathala<sup>a</sup>*

<sup>a</sup> INRA, UR1268 Biopolymères Interactions Assemblages, Rue de la Géraudière, 44316

Nantes, France

\* Corresponding Author: Ana Villares

INRA, UR1268 Biopolymères Interactions Assemblages, Rue de la Géraudière, 44316

Nantes, France

Tel: 00 33 (0)2 40 67 50 18

Email: ana.villares@inra.fr

## **Experimental**

### **FTIR**

Infrared spectra were obtained from KBr pellets containing freeze-dried t-CNC samples placed directly in a Nicolet iS50 FTIR spectrometer (Thermo Scientific) in absorbance mode. All spectra were collected with a  $4\text{ cm}^{-1}$  resolution after 200 continuous scans from 400 to  $4000\text{ cm}^{-1}$ . Oxidized t-CNC were acidified to pH 2 by the addition of HCl in order to protonate carboxylic acids.

### **Preparation of poly(allylamine hydrochloride) (PAH)-coated surfaces**

PAH films were deposited on QCM-D gold electrodes by spin-coating. 1 mL of a PAH solution ( $1\text{ g L}^{-1}$ , PolySciences,  $M_w$  120-200 000  $\text{g mol}^{-1}$ ) was poured onto the substrate and, after 10 min of adsorption, the substrate was spun at 3600 rpm for 60 s. The film was then rinsed with 1 mL of deionized water and spun.

## Results

### T-CNC characterization

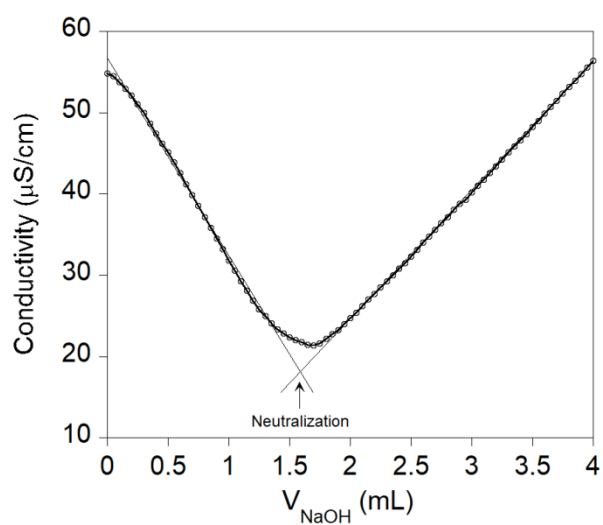

**Figure S1.** Conductometric titration curve of the unmodified t-CNC (10 mL, 6.9 g L<sup>-1</sup>) titrated against NaOH (0.001 M) where the intersection of the two slopes (neutralization point) corresponds to the amount of strong acid (sulfate half ester groups) on the t-CNC surface.

## Introduction of biotin functionality at reducing ends of t-CNC

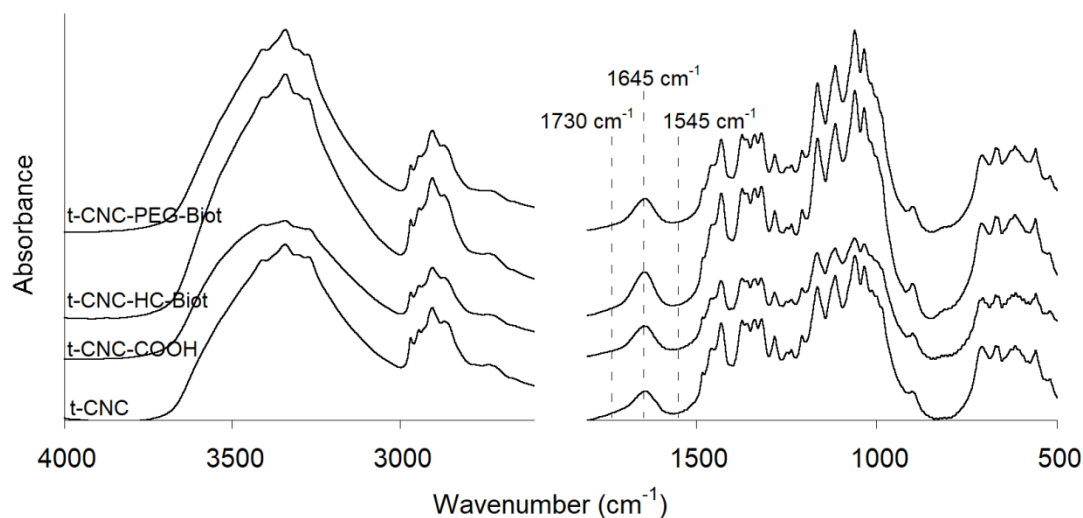

**Figure S2.** FTIR spectra in absorbance of the unmodified t-CNC, oxidized t-CNC (t-CNC-COOH) and both biotin-functionalized t-CNC (t-CNC-HC-Biot and t-CNC-PEG-Biot, respectively).

**Table S1.** FTIR relative peak intensities at 895, 1372, 1430 and 2900  $\text{cm}^{-1}$  and total crystallinity index (TCI) and lateral order index (LOI) calculated from these FTIR data for the unmodified t-CNC, oxidized t-CNC (t-CNC-COOH) and both biotin-functionalized t-CNC (t-CNC-HC-Biot and t-CNC-PEG-Biot, respectively).

|                | 895 $\text{cm}^{-1}$ | 1372 $\text{cm}^{-1}$ | 1430 $\text{cm}^{-1}$ | 2900 $\text{cm}^{-1}$ | TCI       | LOI       |
|----------------|----------------------|-----------------------|-----------------------|-----------------------|-----------|-----------|
| t-CNC          | 0.054                | 0.196                 | 0.190                 | 0.220                 | 0.93±0.06 | 3.66±0.17 |
| t-CNC-COOH     | 0.048                | 0.167                 | 0.163                 | 0.177                 | 0.91±0.04 | 3.33±0.11 |
| t-CNC-HC-Biot  | 0.065                | 0.256                 | 0.246                 | 0.275                 | 0.98±0.07 | 3.82±0.02 |
| t-CNC-PEG-Biot | 0.048                | 0.191                 | 0.182                 | 0.199                 | 0.99±0.00 | 3.82±0.02 |

## Assembly of biotin-functionalized t-CNCs by streptavidin (SAV)

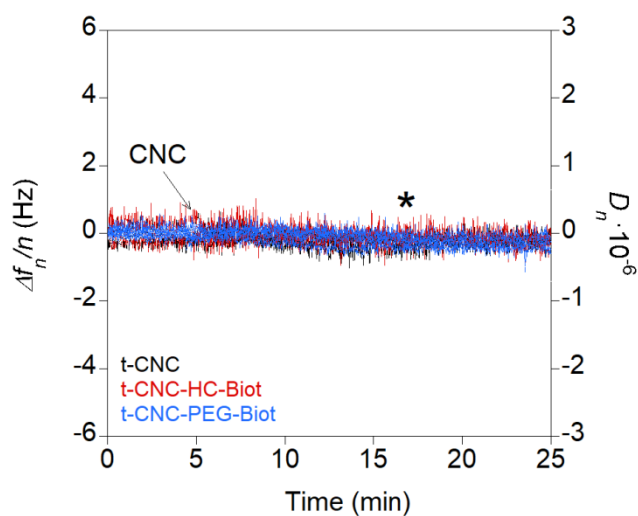

**Figure S3.** Frequency ( $\Delta f_n/n$ ) and dissipation ( $\Delta D_n$ ) changes for the overtone  $n = 3$  during adsorption of unmodified t-CNCs and biotin-functionalized t-CNCs (t-CNC-HC-Biot and t-CNC-PEG-Biot, respectively) at  $0.5 \text{ g L}^{-1}$  in water onto gold surfaces. The arrow indicates the injection of t-CNC, t-CNC-HC-Biot or t-CNC-PEG-Biot and asterisk the rinse step with water.

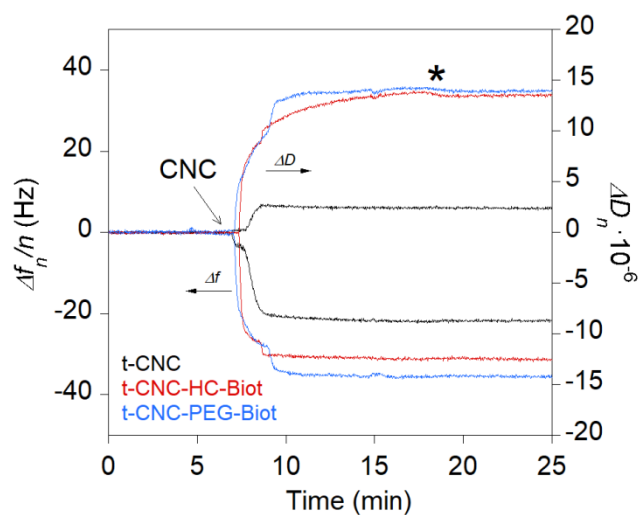

**Figure S4.** Frequency ( $\Delta f_n/n$ ) and dissipation ( $\Delta D_n$ ) changes for the overtone  $n = 3$  during adsorption of unmodified t-CNCs and biotin-functionalized t-CNCs (t-CNC-HC-Biot and t-CNC-PEG-Biot, respectively) at  $0.5 \text{ g L}^{-1}$  onto SAV-coated surfaces at pH 5. The arrow indicates the injection of t-CNC, t-CNC-HC-Biot or t-CNC-PEG-Biot and asterisk the rinse step with water.

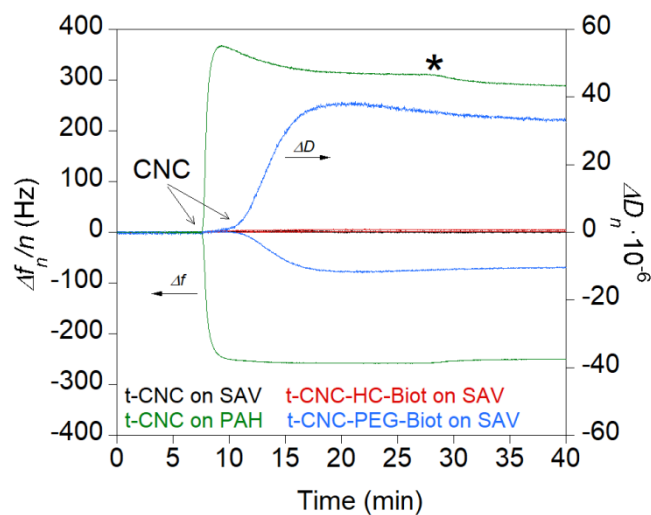

**Figure S5.** Frequency ( $\Delta f_n/n$ ) and dissipation ( $\Delta D_n$ ) changes for the overtone  $n = 3$  during adsorption of unmodified t-CNCs at  $0.5 \text{ g L}^{-1}$  onto PAH-coated surfaces (green line); and unmodified t-CNCs and biotin-functionalized t-CNCs (t-CNC-HC-Biot and t-CNC-PEG-Biot, respectively) at  $0.5 \text{ g L}^{-1}$  onto SAV-coated surfaces at pH 7. The arrow indicates the injection of t-CNCs and the asterisk the rinse step with water.

**Table S2.** Frequency ( $\Delta f_n/n$ ), dissipation ( $\Delta D_n$ ) values at the end of the adsorption process, and dissipation-to-frequency ratios obtained from the  $\Delta D_n - \Delta f_n/n$  plots for the overtone  $n = 3$  corresponding to the adsorption of t-CNC-PEG-Biot onto SAV layers and unmodified t-CNCs onto PAH layers.

|                       | $\Delta f_n/n$ (Hz) | $\Delta D_n \cdot 10^{-6}$ | $ \Delta D_n / \Delta f_n/n  \cdot 10^{-6} \text{ Hz}^{-1}$ |
|-----------------------|---------------------|----------------------------|-------------------------------------------------------------|
| t-CNC-PEG-Biot on SAV | -75.8±97.0          | 36.6±44.2                  | 0.57±0.20                                                   |
| t-CNC on PAH          | -262.4±5.6          | 43.4±4.8                   | 0.20±0.04                                                   |



**Table S3.** Z-average diameter (Z-d) values and polydispersity indexes (PDI) determined by dynamic light scattering for the biotin-functionalized t-CNCs (t-CNC-HC-Biot and t-CNC-PEG-Biot, respectively), before and after the addition of streptavidin. Results are expressed as the mean of 6 measurements  $\pm$  standard deviation.

|                | Before SAV addition |                   | After SAV addition |                   |
|----------------|---------------------|-------------------|--------------------|-------------------|
|                | Z-d (nm)            | PDI               | Z-d (nm)           | PDI               |
| t-CNC-HC-Biot  | 226.2 $\pm$ 8.2     | 0.214 $\pm$ 0.009 | 229.9 $\pm$ 18.4   | 0.236 $\pm$ 0.027 |
| t-CNC-PEG-Biot | 243.9 $\pm$ 10.0    | 0.255 $\pm$ 0.031 | 241.6 $\pm$ 29.8   | 0.276 $\pm$ 0.065 |
